1 **A comparative analysis of the prevalence of suicidal ideation**  
2 **among depressed and non-depressed pregnant women in**  
3 **rural Bangladesh**

4 Rifa Tamanna Mumu<sup>1</sup>, Md Parvez Shaikh<sup>2</sup> Dipak Kumar Mitra<sup>1</sup>

5 <sup>1</sup>Department of Public Health, School of Health and Life Science, North South University,  
6 Bashundhara, Dhaka, Bangladesh

7 <sup>1</sup>Poddar para, Lohagara Pouroshova, Lohagara, Lohagara-7511, Narail, Bangladesh

8 <sup>2</sup>Industrial and Production Engineering, Shahjalal University of Science and Technology, Sylhet,  
9 Bangladesh

10 **\*Corresponding author:**

11 Rifa Tamanna Mumu<sup>1</sup>

12 Poddar para, Lohagara Pouroshova, Lohagara-7511,

13 Narail, Bangladesh.

14 Email: [rifa.tamanna.sbmc@gmail.com](mailto:rifa.tamanna.sbmc@gmail.com)

15

16 **Author Contribution**

17 Investigation, Methodology, Data Curation, Formal Analysis, and Resources: Rifa Tamanna  
18 Mumu<sup>1</sup>

19 Writing (Original draft preparation and Editing): Md Parvez Shaikh<sup>2</sup>

20 Conceptualization, supervision, and Review: Dipak Kumar Mitra<sup>1</sup>

21

## 22 **Declaration of Interest Statement**

23 These authors declare no conflict of interest.

24

## 25 **Acknowledgment**

26 I am profoundly thankful to the Almighty for granting me the opportunity to pursue an MPH  
27 (Epidemiology) at North South University. I am also grateful to North South University for  
28 allowing me to do the research. I am greatly thankful to Dr. S M Mashud, UH&FPO, Upazila  
29 Health Complex, Lohagara, Narail for his unwavering support in the study.

30

## 31 **Funding**

32 This research did not receive any specific grant from funding agencies in the public, commercial,  
33 or not-for-profit sectors.

34

## 35 **Keywords**

36 Antenatal Depression, Mental health, Bangladesh, Maternal health, Prenatal depression,  
37 Depression, Pregnancy

38

39

## 40 **Abstract**

41 **Background:** More than 300 million people all over the world succumbed to depressive  
42 disorders in 2015. 680 per 100,000 expectant mothers worldwide bear suicidal ideation during  
43 the antenatal period. Despite suicidal ideation being a consequence of antenatal depression, there  
44 is a scarcity of information on the prevalence of suicidal ideation in depressed and non-depressed  
45 pregnant women in rural Bangladesh.

46 **Objective:** This study is directed to evaluate the point prevalence of suicidal ideation and  
47 compare the prevalence between depressed and non-depressed pregnant women in rural  
48 Bangladesh.

49 **Method:** A cross-sectional study was performed in Lohagara, a rural subdistrict in Bangladesh  
50 between January 08 and 17, 2024. 351 pregnant women of various trimesters were recruited for  
51 the study. The Bengali-translated version of the Edinburgh Postnatal Depression Scale (EPDS)  
52 and another structured questionnaire were used for data collection. Data analyses were done by  
53 STATA version 17.

54 **Result:** The point prevalence of suicidal ideation is 11.4% (95% CI: 8.5% to 15.2%). It reveals a  
55 similarity between depressed and non-depressed pregnant women. The prevalence of suicidal  
56 thoughts in antenatally depressed women accounts for 10.2% (95% CI: 6.1% to 16.6%) and in  
57 non-depressed pregnant women it is 12.2% (95% CI: 8.4% to 17.3%) -obtained after analysis.

58 **Conclusion:** The considerable prevalence of suicidal thoughts among depressed and non-  
59 depressed rural pregnant women in Bangladesh underscores the necessity of ensuring additional  
60 counseling, care, and support to expectant mothers during their antepartum.

61

## 62 **1. Introduction**

63 Among the common causes of maternal death in some countries, suicide is one, and suicidal  
64 ideation aggravates during pregnancy [1]. 680 in every 100,000 women attempt suicide during  
65 their antenatal period globally [2]. A higher prevalence of suicide is observed among Southeast  
66 Asian pregnant women (2.19%, 95%CI:1.04–3.68)[3]. In 1.6 to 4.5 per 100,000 live births,  
67 women in antenatal and postpartum periods commit suicide in the United States [4]. 20% of  
68 postpartum deaths are occurred by suicide, which is regarded as the second most common cause  
69 of death among the depressed populace [5]. Anxiety, major depression, and unplanned  
70 pregnancy influence the augmentation of suicidal ideation during pregnancy [6].

71 Approximately, 322 million people all over the world were grappling with depressive disorders  
72 in 2015, according to the World Health Organization (WHO) and 27% of them resided in the  
73 Southeast Asian territory [7]. Generally, females are more prone to develop mental health  
74 disorders like depression than their male counterparts [8]. Certain hormonal changes take part in  
75 the antenatal period which enhances the chance of developing depression and raises the  
76 percentage in pregnant women than in non-pregnant [9]. The global range of antenatal  
77 depression is evaluated as 15% to 65% [10]. The prevalence varies from 5% to 30% [11-13] in  
78 high-income countries, while the range is 15.6% to 31.1% in low-income countries [14-16].

79 The rate of depression in prenatal women is 39% (38.86%, 33.9%-44%) in rural Bangladesh [17]  
80 and 14% of depressed women manifest thoughts of self-injury. An unsupportive husband or  
81 mother-in-law, family violence, duress due to the family preference for a male child [18],  
82 duration of pregnancy, suffering from a previous disease, unintentional pregnancy, having  
83 polygamous husbands, and intimate partner violence catalyst the development of depression in

84 the prenatal period [17]. Pregnancy within the first year of the previous one, the inadequacy of  
85 social support from allies, and poor health status are conducive to the augmentation of suicidal  
86 ideation in adolescent pregnant women in Bangladesh [19].

87 Though antenatal depression is revealed to have an association with pregnancy-related suicidal  
88 ideation in many studies [20, 21], there is no study available in Bangladesh investigating the  
89 prevalence of suicidal thoughts in depressed and non-depressed pregnant women. This study is  
90 directed to investigate the point prevalence of suicidal ideation and compare the prevalence in  
91 depressed and non-depressed women in any trimester of pregnancy in a rural subdistrict in  
92 Bangladesh. The notion of the percentage of suicidal ideation in both subgroups will help  
93 formulate specific plans and protective strategies to keep expectant mothers' mental health well  
94 and safeguard them from making dreadful decisions.

95

## 96 **2. Method**

### 97 **2.1 Study Design and Setting**

98 A cross-sectional study was performed between January 08 and 17, 2024, in Upazila Health  
99 Complex, Lohagara, a government hospital, and Khan General Hospital, Lahuria, a private  
100 hospital in Lohagara, a rural sub-district in Narail, situated in the southern part of Bangladesh.

101

### 102 **2.2 Study Participants**

103 The target population was pregnant mothers of any trimester in the Lohagara, and the sample  
104 population was pregnant mothers of any trimesters attending the ANC Corner of Upazila Health  
105 Complex, Lohagara, Narail, and Khan General Hospital, Lahuria for antenatal checkups.

106

## 107 **2.3 Sample Size and Sampling Technique**

108 Considering the prevalence of thoughts of self-harm among pregnant women ( $P_1$ ) in rural  
109 Bangladesh is 14% according to a study conducted in a rural sub-district in Matlab [18], the  
110 estimated prevalence of suicidal ideation among non-depressed pregnant women ( $P_2$ ) is 9%, with  
111 a 95% confidence interval and 80% power, 351 data were collected by systematic sampling to  
112 minimize bias. Every third patient attending antenatal checkups in both government and private  
113 hospitals was selected as a participant in the interview for data collection.

114

## 115 **2.4 Data Collection Tools**

116 The presence of depression and suicidal ideation was assessed by the Bengali-translated version  
117 of the Edinburgh Postnatal Depression Scale (EPDS). This questionnaire consists of 10 questions  
118 scoring from 0 to 30. A score of 10 or higher on the assessment indicates probable antenatal  
119 depression, and the Item-10 of this questionnaire indicates suicidal ideation. Another structured  
120 questionnaire which was also translated into Bengali was used to collect the sociodemographic  
121 data of patients. Questionnaires were tested on some target population rather than the study  
122 participants and the necessary changes were made before the data collection.

123

## 124 **2.5 Data Management & Analysis Plan**

125 The data for the study was analyzed by STATA version 17. A chi-squared test was performed to  
126 assess the association between depression and non-depression with suicidal ideation. The  
127 obtained p-value was used to determine the association between variables.

128

## 129 **2.6 Ethical Considerations**

130 Ethical permission was obtained from the Institutional Ethics Committee of North South  
131 University before data collection (2023/OR-NSU/IRB/1224). Permission letters from Upazila  
132 Health Complex, Lohagara, and Khan General Hospital, Lahuria were taken as well. Informed  
133 written consents were obtained from pregnant women of 18 years before data collection. Legal  
134 guardians of participants signed the written consent form if the participants were under 18.  
135 Respondents were assured of the confidentiality of information as well as informed about the  
136 purpose, benefits, and potential risks of the study.

137

## 138 **3. Result**

### 139 **3.1 Socio-demographic Characteristics of Pregnant Mothers**

140 This research was conducted with the participation of 351 women in any trimester of gestation.  
141 The response rate was 98.5%. The median Edinburgh Postnatal Depression Scale (EPDS) score  
142 was 8, with an interquartile range of 4 to 12. The participants had a mean age of 23 years, with  
143 an interquartile range of 20 to 27 years. Among the respondents, 5.7% (20) were under 18 years

144 old, while a greater percentage (83.7%) were between the age bracket of 18 to 30 years. The rest  
145 10.6% encompassed women of the thirty-plus age range.

146 26 participants (7.4%) did not pass the primary school. All respondents were married, and the  
147 larger portion were housewives. Only (4%) were employed. 26% of women (91) had a family  
148 income of less than 10,000 BDT per month, 58% (203) families earned between 10,000 to  
149 20,000 BDT, and the remaining 16% (56) had a higher monthly income exceeding 20,000 tk.

150 From a religious perspective, the respondents belonged to two communities; 96.3% (337) of the  
151 women were practicing Muslim, and 3.71% (13) were Hindu. **Error! Reference source not**  
152 **found.**

153

## 154 **3.2 Prevalence of depression among pregnant women**

155 In the study, the scores from the 10 questions of the Edinburgh Postnatal Depression Scale  
156 (EPDS) were summed up, creating a new variable ranging from 0 to 30. A cut-off score of 10 or  
157 more was used to indicate the presence of depression. The results showed that 137 women  
158 (39.03%, with a 95% confidence interval ranging from 34% to 44%) exhibited symptoms of  
159 depression during pregnancy and 214 (60.97%, 55.7%-66%) of women didn't have antenatal  
160 depression. **Table 2.**

161

## 162 **3.3 Prevalence of suicidal ideation in pregnancy**



163 A total of 40 women among the 351 had suicidal thoughts during pregnancy which made the  
164 overall prevalence of suicidal ideation 11.4% (95% CI: 8.5% to 15.2%). The determined  
165 prevalence of suicidal ideation among women suffering from antenatal depression was 10.2%  
166 (95% CI: 6.1% to 16.6%). On the contrary, 12.2% (95% CI: 8.4% to 17.3%) of women without  
167 prenatal depression had suicidal thoughts. **Table 3.**

168

## 169 **4. Discussion**

170 This study is directed to assess the prevalence of suicidal ideation among depressed and non-  
171 depressed pregnant women in a rural subdistrict in Narail. The point prevalence of suicidal  
172 ideation is 11.4% (95% CI: 8.5% to 15.2%). The prevalence of suicidal thoughts in antenatally  
173 depressed women accounts for 10.2% (95% CI: 6.1% to 16.6%) and in non-depressed pregnant  
174 women it is 12.2% (95% CI: 8.4% to 17.3%) -according to this study.

175 The obtained prevalence of suicidal ideation in pregnancy from this study aligns with the meta-  
176 analysis conducted by Xiao et. al. involving 23 countries revealing a 10% prevalence of suicidal  
177 thoughts in pregnancy [22] but higher than the study performed by Zhang et.al, which unveiled a  
178 6.71% prevalence. The probable reason for this deviation is the selection of the target population;  
179 pregnant women only in the third trimester were included in the latter [23].

180 This study is also in agreement with the global prevalence (2.73%-18%) of suicidal ideation in  
181 pregnancy [24] and resembles a similarity with the 11.8% prevalence determined in Ethiopia  
182 [25]. 7.6% of women have suicidality in urban India [26]. In the perspective of Bangladesh,  
183 6.5% of adolescent pregnant women attempt suicide [19], whereas 14% of pregnant women at  
184 34-35 weeks of gestational age have thoughts of self-harm [18] which is in line with this study.

185 Depressive disorder is one of the preeminent causes of suicidal ideation and behavior among Sri  
186 Lankan pregnant women, where 7.4% of women develop suicidality during pregnancy and 25%  
187 of women have lifetime suicidal ideation [27]. A 3.9% (95% CI:3.0% to 5.1%) suicidality is  
188 determined among Brazilian expectant women [28].

189 Lower-income countries witness 34.0%, (95% Confidence Interval: 33.1%-34.9%) prevalence of  
190 prenatal depression which is higher than middle-income countries (22.7%, 95% Confidence  
191 Interval: 20.1%-25.2%) [29]. The prevalence of antenatal depression among rural Bangladeshi  
192 pregnant women is 33%-39% (95% CI: 33.9% to 44%). Prenatal major depression is revealed as a  
193 significant conducive factor to the development of suicidal ideation in some global studies [1, 6].  
194 However, perceived insufficient social support, conceived within the first year of the previous  
195 pregnancy, and perceived unfavorable health conditions play crucial roles in generating suicidal  
196 thoughts among adolescent expectant mothers in Bangladesh [19]. In this study, the prevalence  
197 of suicidal ideation reveals a similarity both in antenatally depressed and non-depressed women  
198 (10.2% in depressed and 12.2% in non-depressed pregnant women).

199

## 200 **5. Limitations**

201 In summary, this study was conducted with a comparatively smaller sample size from a certain  
202 subdistrict in Bangladesh due to time and resource limitations. As the data were collected from  
203 two hospitals, there might be a chance of a remaining group of women who were unintended to  
204 seek medical care without experiencing extreme physical conditions. For that reason, this study  
205 might be unable to capture the full diversity of the population leaving a generalizability bias.

206

## 207 **6. Conclusion**

208 In conclusion, approximately one in every hundred women in Bangladesh bear suicidality during  
209 pregnancy and the percentage is almost similar in depressed and non-depressed women. That  
210 signifies the role of other contributing factors in the development of suicidal ideation in  
211 pregnancy. This study underscores the need to evaluate all contributors to antenatal suicidality to  
212 formulate specific plans and programs to minimize the burden of antepartum suicides. In  
213 addition, the considerable prevalence of suicidal thoughts among rural Bangladeshi pregnant  
214 women indicates the necessity of adequate counseling, care, and support for a woman during her  
215 pregnancy.

216

## 217 **Research Data**

218 Data is available on figshare.com. DOI: 10.6084/m9.figshare.24994110

219

## 220 **References**

- 221 1. Gelaye, B., S. Kajeepeta, and M.A. Williams, *Suicidal ideation in pregnancy: an epidemiologic*  
222 *review*. Archives of women's mental health, 2016. **19**: p. 741-751.
- 223 2. Rao, W.-W., et al., *Worldwide prevalence of suicide attempt in pregnant and postpartum women:*  
224 *a meta-analysis of observational studies*. Social psychiatry and psychiatric epidemiology, 2021.  
225 **56**: p. 711-720.
- 226 3. Fuhr, D.C., et al., *Contribution of suicide and injuries to pregnancy-related mortality in low-*  
227 *income and middle-income countries: a systematic review and meta-analysis*. The Lancet  
228 Psychiatry, 2014. **1**(3): p. 213-225.
- 229 4. Wallace, M.E., et al., *Pregnancy-associated homicide and suicide in 37 US states with enhanced*  
230 *pregnancy surveillance*. American journal of obstetrics and gynecology, 2016. **215**(3): p. 364. e1-  
231 364. e10.
- 232 5. Lindahl, V., J.L. Pearson, and L. Colpe, *Prevalence of suicidality during pregnancy and the*  
233 *postpartum*. Archives of women's Mental Health, 2005. **8**: p. 77-87.

- 234 6. Newport, D.J., et al., *Suicidal ideation in pregnancy: assessment and clinical implications*.  
235 Archives of women's mental health, 2007. **10**: p. 181-187.
- 236 7. World Health Organization, *Depression and other common mental disorders: global health*  
237 *estimates*. 2017.
- 238 8. Kuehner, C., *Gender differences in unipolar depression: an update of epidemiological findings*  
239 *and possible explanations*. Acta Psychiatrica Scandinavica, 2003. **108**(3): p. 163-174.
- 240 9. Osman, N.N. and A.I. Bahri, *Impact of altered hormonal and neurochemical levels on depression*  
241 *symptoms in women during pregnancy and postpartum period*. Journal of Biochemical  
242 Technology, 2019. **10**(1): p. 16.
- 243 10. Dadi, A.F., et al., *Global burden of antenatal depression and its association with adverse birth*  
244 *outcomes: an umbrella review*. BMC public health, 2020. **20**: p. 1-16.
- 245 11. Mukherjee, S., et al., *Racial/ethnic disparities in antenatal depression in the United States: A*  
246 *systematic review*. Maternal and child health journal, 2016. **20**: p. 1780-1797.
- 247 12. Chatillon, O. and C. Even, *La dépression de l'antepartum: prévalence, diagnostic, traitement*.  
248 L'Encéphale, 2010. **36**(6): p. 443-451.
- 249 13. Mitchell Jones, N., et al., *Psychological morbidity associated with hyperemesis gravidarum: a*  
250 *systematic review and meta-analysis*. BJOG: An International Journal of Obstetrics &  
251 Gynaecology, 2017. **124**(1): p. 20-30.
- 252 14. Biaggi, A., et al., *Identifying the women at risk of antenatal anxiety and depression: a systematic*  
253 *review*. Journal of affective disorders, 2016. **191**: p. 62-77.
- 254 15. Minamoto, V.B., et al., *Dramatic changes in muscle contractile and structural properties after 2*  
255 *botulinum toxin injections*. Muscle & nerve, 2015. **52**(4): p. 649-657.
- 256 16. Woody, C., et al., *A systematic review and meta-regression of the prevalence and incidence of*  
257 *perinatal depression*. Journal of affective disorders, 2017. **219**: p. 86-92.
- 258 17. Mumu, R.T. and D.K. Mitra, *Prevalence and associated factors of antenatal depression in rural*  
259 *Bangladesh*. medRxiv, 2024: p. 2024.05. 30.24308225.Preprint.
- 260 18. Gausia, K., et al., *Antenatal depression and suicidal ideation among rural Bangladeshi women: a*  
261 *community-based study*. Archives of women's mental health, 2009. **12**: p. 351-358.
- 262 19. Li, J., et al., *Suicide attempt and its associated factors amongst women who were pregnant as*  
263 *adolescents in Bangladesh: a cross-sectional study*. Reproductive health, 2021. **18**: p. 1-9.
- 264 20. Gavin, A.R., et al., *Prevalence and correlates of suicidal ideation during pregnancy*. Archives of  
265 women's mental health, 2011. **14**: p. 239-246.
- 266 21. YANG, W., et al., *Relationship between depression and suicidal ideation in pregnant women and*  
267 *its risk factors*. Chinese General Practice, 2020. **23**(3): p. 305.
- 268 22. Xiao, M., et al., *Prevalence of suicidal ideation in pregnancy and the postpartum: A systematic*  
269 *review and meta-analysis*. Journal of affective disorders, 2022. **296**: p. 322-336.
- 270 23. Zhang, L., et al., *The prevalence of suicide ideation and predictive factors among pregnant*  
271 *women in the third trimester*. BMC pregnancy and childbirth, 2022. **22**(1): p. 266.
- 272 24. Legazpi, P.C.C., et al., *Review of suicidal ideation during pregnancy: risk factors, prevalence,*  
273 *assessment instruments and consequences*. Psicologia: Reflexão e Crítica, 2022. **35**: p. 13.
- 274 25. Belete, K., et al., *Prevalence and correlates of suicide ideation and attempt among pregnant*  
275 *women attending antenatal care services at public hospitals in southern Ethiopia*.  
276 Neuropsychiatric disease and treatment, 2021: p. 1517-1529.
- 277 26. Supraja, T., et al., *Suicidality in early pregnancy among antepartum mothers in urban India*.  
278 Archives of women's mental health, 2016. **19**: p. 1101-1108.
- 279 27. Palfreyman, A., *Addressing psychosocial vulnerabilities through antenatal care—depression,*  
280 *suicidal ideation, and behavior: a study among urban Sri Lankan women*. Frontiers in psychiatry,  
281 2021. **12**: p. 554808.
- 282 28. Faisal-Cury, A., et al., *Prevalence and associated risk factors of suicidal ideation among*  
283 *Brazilian pregnant women: a population-based study*. Frontiers in psychiatry, 2022. **13**: p.  
284 779518.

285 29. Fekadu Dadi, A., E.R. Miller, and L.J.P.o. Mwanri, *Antenatal depression and its association with*  
 286 *adverse birth outcomes in low and middle-income countries: a systematic review and meta-*  
 287 *analysis*. 2020. **15**(1): p. e0227323.

288

## 289 **Tables**

290 ***Table 1. Sociodemographic characteristics of pregnant women attending antenatal checkups***  
 291 ***in Upazila Health Complex, Lohagara, Narail, 2024***

| <b>Sociodemographic status of pregnant women</b> |          |          |
|--------------------------------------------------|----------|----------|
| <b>Variables</b>                                 | <b>n</b> | <b>%</b> |
| <b>Age</b>                                       |          |          |
| <18 years                                        | 20       | 5.71     |
| 18-30 years                                      | 293      | 83.71    |
| >30 years                                        | 37       | 10.57    |
| <b>Education</b>                                 |          |          |
| Below class 5                                    | 26       | 7.43     |
| Higher                                           | 324      | 92.57    |
| <b>Employment status</b>                         |          |          |
| Employed                                         | 14       | 4        |
| Unemployed                                       | 336      | 96       |
| <b>Family income (BDT)</b>                       |          |          |
| <10,000                                          | 91       | 26       |
| 10,000-20,000                                    | 203      | 58       |
| >20,000                                          | 56       | 16       |
| <b>Religion</b>                                  |          |          |
| Hindu                                            | 13       | 3.7      |
| Muslim                                           | 337      | 96.3     |
| Others                                           | 0        | 0        |

292

293 ***Table 2. Prevalence of Antenatal Depression in Lohagara, Narail, 2024***

| <b>Prevalence of antenatal depression</b> |                   |          |          |
|-------------------------------------------|-------------------|----------|----------|
| <b>Depression</b>                         | <b>EPDS score</b> | <b>n</b> | <b>%</b> |
|                                           |                   |          |          |

|     |       |     |       |
|-----|-------|-----|-------|
| Yes | 10-30 | 137 | 39.03 |
| No  | 0-9   | 214 | 60.97 |

294

295 *Table 3. Prevalence of suicidal ideation among depressed and non-depressed pregnant women*

296 *in Lohagara, Narail, 2024*

| Suicidal Ideation | Antenatal Depression |               | Total        |
|-------------------|----------------------|---------------|--------------|
|                   | Yes                  | No            |              |
| Yes               | 14<br>10.22%         | 26<br>12.15%  | 40<br>11.40% |
| No                | 123<br>89.78%        | 188<br>87.85% | 311<br>88.6% |
| <b>Total</b>      | 137<br>100%          | 214<br>100%   | 351<br>100%  |

297
